# Supplementary material for: TP53 germline mutations in the context of families with hereditary breast and ovarian cancer: a clinical challenge
Source: PubMed Central journal article supplement (PMC8087555; doi:10.1007/s00404-020-05883-x), 2020-11-27
Supplement: 404_2020_5883_MOESM1_ESM.pdf [file 404_2020_5883_MOESM1_ESM.pdf]

### Supplement 1: Clinical characteristics- deleterious and likely deleterious mutations in TP53 gene

| Genomic position           | Protein change | DNA domain         | Transcriptional activity in yeast (% of wild-type) | Relative fitness score (RFS)** | LFS/Chompret criteria       | Index                           | Tumor subtype                          | Family history                                                                                                                                                                                                                                                                                          |
|----------------------------|----------------|--------------------|----------------------------------------------------|--------------------------------|-----------------------------|---------------------------------|----------------------------------------|---------------------------------------------------------------------------------------------------------------------------------------------------------------------------------------------------------------------------------------------------------------------------------------------------------|
| c.375G>A                   | p.Thr125Thr    | DNA binding domain | Unknown                                            | $RFS \leq -1$                  | No                          | BC bilateral 39 yrs             | HR pos, Her2 neg                       | none                                                                                                                                                                                                                                                                                                    |
| c.542G>A                   | Arg181His      | DNA binding domain | Medium reduction (50.3%)                           | $RFS \leq -1$                  | No                          | BC 46yrs                        | HR pos, Her2 neg                       | <u>mother</u> : BC 41 yrs<br><u>aunt (m)</u> : unknown cancer 40yrs                                                                                                                                                                                                                                     |
| c.700T>C                   | Tyr234His      | DNA binding domain | Very strong reduction (0.89%)                      | $RFS > -1$                     | Yes (Chompret criteria (1)) | BC 33yrs and CRC 21yrs          | HR neg<br>HER2 pos                     | <u>brother</u> : glioblastoma 32yrs                                                                                                                                                                                                                                                                     |
| c.717C>G                   | Asn239Lys      | DNA binding domain | Moderate strong reduction (26.4%)                  | $RFS < -1$                     | Yes (classic LFS)           | BC bilateral 32&34 yrs          | 32yrs: HR pos<br>HER2 pos; 34yrs: TNBC | <u>brother</u> : lung cancer 36yrs<br><u>sister</u> : BC 26 yrs<br><u>sister</u> : BC 39 yrs;<br><u>corresponding son</u> : osteosarcoma 14 yrs and gastric cancer 35yrs<br><u>father</u> : brain tumor <50yrs                                                                                          |
| c.733G>A                   | Gly245Ser      | DNA binding domain | Strong reduction (4.2%)                            | $RFS > -1$                     | Yes (Chompret criteria (1)) | BC 49yrs                        | HR pos, Her2 neg                       | <u>sister</u> : bilateral BC 30&45 yrs and CRC 55yrs<br><u>brother</u> : ACC 56yrs, CRC 53yrs and prostate cancer 56 yrs;<br><u>father</u> : testicular cancer 32 yrs, prostate cancer 68yrs and lung cancer 71 yrs<br><u>uncle (p)</u> : brain tumor 48yrs<br><u>aunt (p)</u> : pancreas cancer 59 yrs |
| c.742C>T                   | Arg248Trp      | DNA binding domain | Very strong reduction (0.09%)                      | $RFS > -1$                     | Yes (Chompret criteria (4)) | BC 26 yrs                       | HR pos, Her2 pos                       | none                                                                                                                                                                                                                                                                                                    |
| c.743G>A                   | p.Arg248Gln    | DNA binding domain | Very strong reduction (0.21%)                      | $RFS > -1$                     | Yes (classic LFS)           | BC 34yrs and osteosarcoma 16yrs | TNBC                                   | <u>daughter</u> : neuroblastoma 2yrs                                                                                                                                                                                                                                                                    |
| c.783-2A>G splice acceptor |                | DNA binding domain | Unknown                                            | Unknown                        | Yes (Chompret criteria (4)) | BC 35yrs                        | HR pos, Her2 neg                       | <u>sister</u> : BC 35yrs<br><u>mother</u> : BC: 28yrs<br><u>uncle (m)</u> : pharynx cancer 68yrs<br><u>grandmother (m)</u> : CRC 86 yrs                                                                                                                                                                 |
| c.800G>C                   | p.Arg267 Pro   | DNA binding domain | Very strong reduction (0.46%)                      | $RFS > -1$                     | Yes (Chompret criteria (4)) | BC 22yrs                        | HR pos<br>HER2 pos                     | none                                                                                                                                                                                                                                                                                                    |
| c.817C>T                   | p.273Arg>Cys   | DNA binding domain | Very strong reduction (0.76%)                      | $RFS > -1$                     | Yes (Chompret criteria (1)) | BC 43 yrs                       | HR pos, Her2 pos                       | <u>daughter</u> : leukemia 4 yrs<br><u>brother</u> : rectum cancer 17yrs<br><u>mother</u> : BC 40 yrs and "abdominal cancer" 54 yrs<br><u>aunt (m)</u> : lung cancer 52 yrs                                                                                                                             |

|          |           |                    |                          |                 |                             |                       |                                       |                          |
|----------|-----------|--------------------|--------------------------|-----------------|-----------------------------|-----------------------|---------------------------------------|--------------------------|
| c.818G>A | Arg273His | DNA binding domain | Strong reduction (2.51%) | <i>RFS</i> > -1 | Yes (Chompret criteria (4)) | BC bilateral 28&32yrs | 28yrs: TNBC; 32 yrs: HR pos, Her2 pos | <u>mother</u> : BC 28yrs |
|----------|-----------|--------------------|--------------------------|-----------------|-----------------------------|-----------------------|---------------------------------------|--------------------------|

### Supplement 2: Clinical characteristics- variants of uncertain significance in *TP53* gene

| Genomic position | Protein change      | DNA domain                  | Transcriptional activity in yeast (% of wild-type) | Relative fitness score (RFS)** | LFS/Chompret criteria       | Index                 | Tumor subtype                                        | Family history                                                                                                                  |
|------------------|---------------------|-----------------------------|----------------------------------------------------|--------------------------------|-----------------------------|-----------------------|------------------------------------------------------|---------------------------------------------------------------------------------------------------------------------------------|
| c.26G>A          | p.Ser9Asn           | Transactivation domain 1    | (26.01%)                                           | Unknown                        | No                          | DCIS 49 yrs           | -                                                    | <u>father</u> : melanoma 70 yrs                                                                                                 |
| c.29T>G          | p.Val10Gly          | Transactivation domain 1    | (98.91%)                                           | Unknown                        | Yes (Chompret criteria (4)) | BC 28 yrs             | HR pos HER2 pos                                      | None                                                                                                                            |
| c.217G>A         | p.Val73Met          | Transactivation domain 2    | (93.8%)                                            | Unknown                        | No                          | DCIS 46 yrs           | -                                                    | <u>mother</u> : BC 43 yrs<br><u>cousin (m)</u> : DCIS 45 yrs                                                                    |
| c.255T>C         | p.Pro85Pro          | Transactivation domain 2    | Unknown                                            | Unknown                        | Yes (Chompret criteria (4)) | BC 30 yrs             | N.A.                                                 | none                                                                                                                            |
| c.266C>A         | p.Pro89His          | Transactivation domain 2    | (5.96%)                                            | Unknown                        | No                          | BC 45 yrs             | HR pos HER2 neg                                      | <u>father</u> : prostate cancer 62 yrs and pancreatic cancer 84 yrs                                                             |
| c.333G>T         | p.Leu111Leu         | DNA-binding domain          | Unknown                                            | <i>RFS</i> ≤-1                 | No                          | BC 39 yrs             | HR pos HER2 neg                                      | <u>mother</u> : BC bilateral 48 & 68 yrs<br><u>father</u> : CRC 51 yrs<br><u>grandmother (p)</u> : CRC 71 yrs                   |
| c.375+6T>C       |                     | DNA-binding domain          | Unknown                                            | Unknown                        | No                          | BC 45yrs              | HR pos HER2 pos                                      | <u>sister</u> : BC 41 yrs (negative for VUS TP53)<br><u>father</u> : CRC 65 yrs and pancreatic cancer 77 yrs                    |
| c.457C>T         | p.Pro153Ser         | DNA-binding domain          | (83.55%)                                           | <i>RFS</i> ≤-1                 | No                          | BC 39 yrs             | HR pos HER2 neg                                      | <u>sister</u> : BC 50yrs                                                                                                        |
| c.470T>G         | p.Val157Gly         | DNA-binding domain          | (9.2%)                                             | <i>RFS</i> >-1                 | No                          | BC bilateral 33yrs    | HR pos HER2 neg and HR neg HER2 pos                  | none                                                                                                                            |
| c.523C>T         | p.Arg175 Cys        | DNA binding domain          | (84.36%)                                           | <i>RFS</i> ≤-1                 | No                          | BC 48 yrs             | HR pos Her2 neg                                      | <u>mother</u> : BC 48yrs                                                                                                        |
| c.529_546del     | p.Pro177_Cys 182del | DNA binding domain          | unknown                                            | unknown                        | Yes (Chompret criteria (1)) | BC bilateral 37&39yrs | 37yrs: TNBC; 39yrs HR pos HER2 neg                   | <u>sister</u> : BC 32yrs<br><u>father</u> : choroidal melanoma 72yrs                                                            |
| c.572-574del     | p.Pro191del         | DNA-binding domain          | Unknown                                            | Unknown                        | Yes (Chompret criteria (1)) | DCIS 45 yrs           | -                                                    | <u>sister (twin)</u> : CRC 33 yrs<br><u>sister</u> : brain tumor 32 yrs<br><u>mother</u> : BC 53yrs and abdominal sarcoma 64yrs |
| c.663G>A         | p.Glu221Glu         | DNA-binding domain          | Unknown                                            | <i>RFS</i> ≤-1                 | No                          | BC 64 yrs             | TNBC                                                 | <u>mother</u> : BC 67 yrs                                                                                                       |
| c.847C>T         | p.Arg283Cys         | DNA-binding domain          | (85.49%)                                           | <i>RFS</i> ≤-1                 | No                          | BC 50 yrs             | HR pos HER2 neg                                      | <u>father</u> : plasmoytom 84yrs                                                                                                |
| c.927C>T         | p.Pro309 Pro        | Nuclear localization domain | Unknown                                            | Unknown                        | No                          | BC bilateral 48&61yrs | BC 48yrs: HR pos HER2 neg; BC 61yrs: HR pos HER2 neg | <u>father</u> : gastric cancer 76 yrs<br><u>aunt (p)</u> : gastric cancer 75yrs                                                 |
| c.1014 C>T       | p.Phe338Phe         | tetramerization domain      | Unknown                                            | Unknown                        | No                          | DCIS 50 yrs           | -                                                    | <u>sister</u> : BC bilateral 45 yrs<br><u>mother</u> : BC bilateral 81 & 85 yrs                                                 |
| c.1014 C>T       | p.Phe338Phe         | tetramerization domain      | Unknown                                            | Unknown                        | No                          | BC 34 yrs             | HR pos HER 2                                         | none                                                                                                                            |

|           |             |                      |          |         |                                   |                           |                                                                |                                                                                                                                         |
|-----------|-------------|----------------------|----------|---------|-----------------------------------|---------------------------|----------------------------------------------------------------|-----------------------------------------------------------------------------------------------------------------------------------------|
|           |             | n domain             |          |         |                                   |                           | neg                                                            |                                                                                                                                         |
| c.1079G>C | p.Gly360Ala |                      | (78.04%) | Unknown | No                                | BC bilateral<br>51&63 yrs | BC 51yrs: HR<br>pos Her2 neg;<br>BC 63 yrs: HR<br>pos HER2 pos | <u>sister</u> : melanoma 50 yrs<br><u>brother</u> : prostate cancer<br><u>mother</u> : pleural carcinosis<br>(unknown primaries) 75 yrs |
| c.1163A>C | p.Gln388Ala | regulatory<br>domain | (112%)   | Unknown | Yes<br>(Chompret<br>criteria (4)) | BC 27 yrs                 | HR pos HER2<br>pos                                             | Confirmed maternal<br>inheritance, broader cancer<br>diseases are missing                                                               |
| c.1171G>A | p.Asp391Asn | regulatory<br>domain | (94.24%) | Unknown | No                                | BC 37 yrs                 | HR pos HER2<br>neg                                             | None, parents healthy<br>(mother s.a. bilateral<br>Adnexectomy at the age of<br>30yrs )                                                 |
